# Supplementary material
Source: ML conference proceedings conference paper supplement (https://openaccess.thecvf.com/content/ICCV2023/html/Shao_Action_Sensitivity_Learning_ICCV_2023_paper.html)
Supplement: Supplementary file 1 [file Shao_Action_Sensitivity_Learning_ICCV_2023_supplemental.pdf]

# Supplementary Material: Action Sensitivity Learning for Temporal Action Localization

Jiayi Shao<sup>1</sup>, Xiaohan Wang<sup>1</sup>, Ruijie Quan<sup>1</sup>, Junjun Zheng<sup>2</sup>, Jiang Yang<sup>2</sup>, Yi Yang<sup>1</sup>  
<sup>1</sup>ReLER Lab, CCAI, Zhejiang University, <sup>2</sup>Alibaba Group

This document provides more details of our approach and additional experimental results, as shown below:

- Details of Implementation and Architecture of ASL
- Additional Quantitative Results on ActivityNet1.3
- Additional Ablative Results
- Additional Qualitative Results

## 1. Details of Implementation and Architecture

The overall architecture is detailed in Table a. For each dataset, the training and architecture details are of little difference.

Respectively, for Multithumos [14], we use RGB-only I3D [3] pretrained on Kinetics to extract the video features. We upsample the input features to a fixed length of 1024 using linear interpolation and train the model with a batch size of 2, a learning rate of 0.0002, an epoch of 60 and a weight decay of 0.05.

For Charades [11], we use RGB-only I3D [3] model to extract the video features. We upsample the input features to a fixed length of 512 and train the model with a batch size of 32, a learning rate of 0.0004, an epoch of 15 and a weight decay of 0.05.

For Ego4D-Moment Queries v1.0 [7], we use EgoVLP [9], Slowfast [5] and Omnivore [6] network to extract the video features. We upsample the input features to a fixed length of 1024 and train the model with a batch size of 2, a learning rate of 0.0001, an epoch of 10 and a weight decay of 0.05.  $l_1 = 2$ ,  $l_2 = 3$ .  $l_3$  equals 8. The number of heads and embedding dimension  $d_{emb}$  are 8 and 512.

For Epic Kitchens 100 [4], we use Slowfast [5] features. We upsample the input features to a fixed length of 1024 and train the model with a batch size of 2, a learning rate of 0.0001, and a weight decay of 0.05 on noun and verb sub-task for 20 and 15 epochs respectively.

For Thumos14 [12], we use two-stream I3D [3] pretrained on Kinetics to extract the video features. We extend the input length to 1024 and train the model with a batch size of 2, a learning rate of 0.0001, an epoch of 30 and a weight decay of 0.05.

For ActivityNet1.3 [2], we use two-stream I3D [3] pretrained on Kinetics to extract the video features. We down-sample the input features to a fixed length of 192 and train the model with a batch size of 16, a learning rate of 0.001, an epoch of 13 and a weight decay of 0.01. The number of heads and embedding dimension  $d_{emb}$  are 4 and 256.

For most datasets (if no additional noting),  $l_1 = 1$ ,  $l_2 = 2$ .  $l_3$  equals 5,  $l_4$  equals 2, the number of heads and embedding dimension  $d_{emb}$  are 8 and 512. For all datasets, we use AdamW optimizer with a linear warmup and a cosine learning rate decay strategy. We present the pseudo-code of Action Sensitivity Learning (ASL) as shown in Algorithm 1.

---

### Algorithm 1 The pseudo-code of ASL

---

**Arguments:**The labeled dataset  $\mathcal{H} = \{V\}$ , ground-truth instance  $\mathcal{G} = \{\bar{t}^s, \bar{t}^e, \bar{c}\}$ , Transformer Encoder  $\mathcal{E}$ , class-level action sensitivity  $p^{cls}, p^{loc}$  instance-level evaluator  $\Phi^{cls}, \Phi^{loc}$ , localization head  $\mathcal{D}_{loc}$ , classification head  $\mathcal{D}_{cls}$ .

- 1: initialize  $h^{cls}, h^{loc}, \mathcal{E}, \Phi^{cls}, \Phi^{loc}, \mathcal{D}_{loc}, \mathcal{D}_{cls}$
  - 2: **for**  $i \in [1, 2, \dots, N]$  **do**:
  - 3:   Sample batch  $B \in \mathcal{H}$
  - 4:    $\mathcal{L} \leftarrow 0$
  - 5:   **for**  $V$  in  $B$  **do**:
  - 6:      $f \leftarrow \mathcal{E}(V)$
  - 7:      $f_{gt} \leftarrow \text{Sampling}(f, (\bar{t}^s, \bar{t}^e))$
  - 8:      $q^{cls} \leftarrow \Phi^{cls}(f_{gt})$
  - 9:      $q^{loc} \leftarrow \Phi^{loc}(f_{gt})$
  - 10:      $h^{cls} \leftarrow p^{cls} \mathbb{1}[\bar{c}] + q^{cls}$
  - 11:      $h^{loc} \leftarrow p^{loc} \mathbb{1}[\bar{c}] + q^{loc}$
  - 12:      $\mathcal{L} \leftarrow \mathcal{L} + h^{loc} \mathcal{L}_{loc}$
  - 13:      $\mathcal{L} \leftarrow \mathcal{L} + h^{cls} \mathcal{L}_{cls}$
  - 14:      $\mathcal{L} \leftarrow \mathcal{L} + \mathcal{L}_s$  ▷ Defined in Eq.7.
  - 15:    $\mathcal{L} \leftarrow \mathcal{L} + \mathcal{L}_{ASCL}$  ▷ Defined in Eq.14.
  - 16:   Calculate  $\partial \mathcal{L}$
  - 17:   Update  $h^{cls}, h^{loc}, \mathcal{E}, \Phi^{cls}, \Phi^{loc}, \mathcal{D}_{loc}, \mathcal{D}_{cls}$
  - 18: return  $h^{cls}, h^{loc}, \mathcal{E}, \Phi^{cls}, \Phi^{loc}, \mathcal{D}_{loc}, \mathcal{D}_{cls}$
-

Table a. **The architecture of our model.** conv denotes 1-D convolution layers, where  $k$  is the kernel size,  $s$  is the stride,  $c_i, c_o$  is the input and output features dimensions. For Transformer-based parts, DS denotes Downsampling, self attn and channel attn is the normal self-attention operation on the temporal dimension and proposed channel attention operation on the channel dimension. GT from DS Transformer $_i$  denotes using ground-truth segments to sample features from outputs of DS Transformer $_i$ .  $T_{GT}$  is the length of ground-truth segments. FC denotes fully connected layers.

|                          | Name                                              | Layer                                                                                     | Input                       | Output Size                                                         |
|--------------------------|---------------------------------------------------|-------------------------------------------------------------------------------------------|-----------------------------|---------------------------------------------------------------------|
|                          | Input clip                                        | -                                                                                         | -                           | $T \times D$                                                        |
| encoder                  | Projection                                        | conv $k=3, s=1(c_i=D, c_o=d_{emb})$                                                       | input clip                  | $T \times d_{emb}$                                                  |
|                          | TCN enc                                           | $l_1 \times [\text{conv } k=3, s=1(c_i=d_{emb}, c_o=d_{emb})]$                            | Projection                  | $T \times d_{emb}$                                                  |
|                          | Transformer enc                                   | $l_2 \times [[\text{self attn} + \text{channel attn}], [\text{feedforward network}]]$     | TCN enc                     | $T \times d_{emb}$                                                  |
|                          | DS Transformer $_i$ ,<br>( $i=1, 2, \dots, l_3$ ) | $l_3 \times [[\text{self attn}], [\text{feedforward network}]]$                           | DS Transformer $_{i-1}$     | $\frac{T}{2^{i-1}} \times d_{emb}$                                  |
| Instance-level evaluator | Inst. evaluator                                   | $l_4 \times [\text{conv } k=3, s=1(c_i=d_{emb}, c_o=d_{emb})]$<br>FC ( $c_i=512, c_o=1$ ) | GT from DS Transformer $_i$ | $T_{GT} \times d_{emb}$<br>$T_{GT} \times 1$                        |
| heads                    | Cls or Loc heads                                  | conv $k=3, s=1(c_i=d_{emb}, c_o=512)$                                                     | DS Transformer $_i$         | $\frac{T}{2^{i-1}} \times d_{emb}$                                  |
|                          |                                                   | conv $k=3, s=1(c_i=512, c_o=512)$                                                         |                             | $\frac{T}{2^{i-1}} \times d_{emb}$                                  |
|                          |                                                   | conv $k=3, s=1(c_i=512, c_o=1 \text{ or } 2)$                                             |                             | $\frac{T}{2^{i-1}} \times 1 \text{ or } \frac{T}{2^{i-1}} \times 2$ |

Table b. **Additional Results on ActivityNet1.3.** We report  $mAP$  at different tIoU thresholds. Average  $mAP$  in  $[0.5:0.05:0.95]$  is reported on ActivityNet1.3. Best results are in **bold**.

| Model             | Feature     | ActivityNet1.3 |             |            |             |
|-------------------|-------------|----------------|-------------|------------|-------------|
|                   |             | 0.5            | 0.75        | 0.95       | Avg.        |
| AFSD [8]          | I3D [3]     | 52.4           | 35.3        | 6.5        | 34.4        |
| TadTR [10]        | I3D [3]     | 49.1           | 32.6        | 8.5        | 32.3        |
| Actionformer [15] | I3D [3]     | 54.2           | 36.9        | 7.6        | 36.0        |
| Actionformer [15] | TSP [1, 13] | 54.7           | 37.8        | 8.4        | 36.6        |
| ASL               | I3D [3]     | 54.1           | 37.4        | 8.0        | 36.2        |
| ASL               | TSP [1, 13] | <b>54.9</b>    | <b>37.8</b> | <b>8.6</b> | <b>36.7</b> |

Table c. **Additional Ablations on Thumos14.** *Class.* and *Inst.* means using class-level and instance-level action sensitivity learning.

| method                | avg mAP |
|-----------------------|---------|
| baseline              | 66.08   |
| baseline + Inst.      | 66.96   |
| baseline + Class.     | 67.12   |
| baseline + ASL        | 67.74   |
| baseline + ASL + ASCL | 67.88   |

## 2. Additional Quantitative Results on ActivityNet1.3

[15] shows that using TSP features [1, 13] will benefit the performance on ActivityNet1.3 [2] more. We here report additional quantitative results on ActivityNet1.3 using TSP features. As shown in Table b, ASL also outperforms previous state-of-the-art methods using no matter I3D or TSP features, demonstrating the advantages of our approach.

## 3. Additional Ablative Results

This section provides additional ablative results on Thumos14 [12]. As shown in c, *baseline* denotes our base

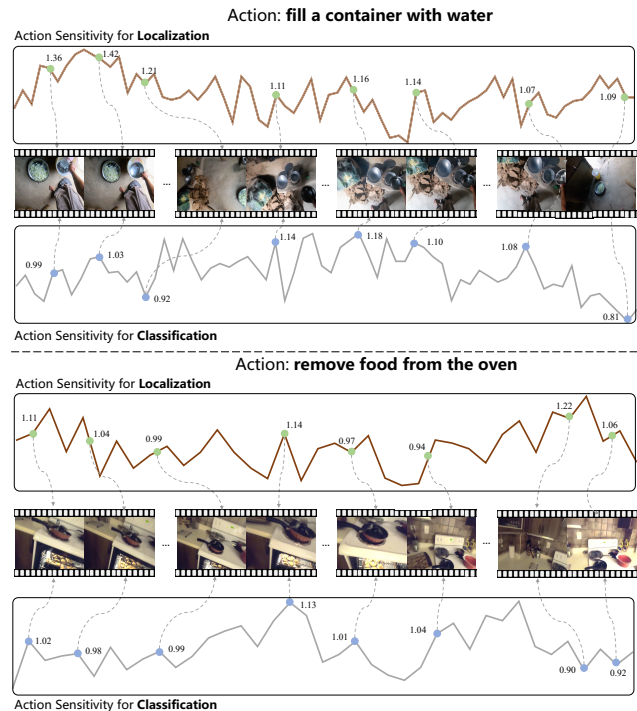

Figure a. Visualization of (Top) the frame sensitivity to sub-tasks of Action: **fill a container with water** and (bottom) Action: **remove food from the oven**. Please zoom in for the best view.

model without action sensitivity learning, our proposed action sensitivity learning and contrastive loss both boosts the performance of average  $mAP$ .

## 4. Addition Qualitative Results

In this section, we provide more qualitative results for action sensitivity learning. As shown in a, we provide qualitative results of action: *fill a container with water* and *re-*

*move food from the oven*. Frames involving main components of action (i.e. *water and pot, food*) are of a relatively high action sensitivity while those ambiguous and transitional frames are of a lower action sensitivity for both classification and localization sub-task. Meanwhile, sensitive frames may vary depending on the specific sub-tasks, in line with our decoupled design.

## References

- [1] Humam Alwassel, Silvio Giancola, and Bernard Ghanem. Tsp: Temporally-sensitive pretraining of video encoders for localization tasks. In *Proceedings of the IEEE/CVF International Conference on Computer Vision (ICCV) Workshops*, 2021. 2
- [2] Fabian Caba Heilbron, Victor Escorcia, Bernard Ghanem, and Juan Carlos Niebles. Activitynet: A large-scale video benchmark for human activity understanding. In *Proceedings of the IEEE conference on computer vision and pattern recognition*, pages 961–970, 2015. 1, 2
- [3] Joao Carreira and Andrew Zisserman. Quo vadis, action recognition? a new model and the kinetics dataset. In *Proceedings of the IEEE Conference on Computer Vision and Pattern Recognition*, pages 6299–6308, 2017. 1, 2
- [4] Dima Damen, Hazel Doughty, Giovanni Maria Farinella, Sanja Fidler, Antonino Furnari, Evangelos Kazakos, Davide Moltisanti, Jonathan Munro, Toby Perrett, Will Price, and Michael Wray. Scaling egocentric vision: The epic-kitchens dataset. In *European Conference on Computer Vision (ECCV)*, 2018. 1
- [5] Christoph Feichtenhofer, Haoqi Fan, Jitendra Malik, and Kaiming He. Slowfast networks for video recognition. In *Proceedings of the IEEE/CVF International Conference on Computer Vision (ICCV)*, October 2019. 1
- [6] Rohit Girdhar, Mannat Singh, Nikhila Ravi, Laurens van der Maaten, Armand Joulin, and Ishan Misra. Omnivore: A Single Model for Many Visual Modalities. In *CVPR*, 2022. 1
- [7] Kristen Grauman, Andrew Westbury, Eugene Byrne, Zachary Chavis, Antonino Furnari, Rohit Girdhar, Jackson Hamburger, Hao Jiang, Miao Liu, Xingyu Liu, et al. Ego4d: Around the world in 3,000 hours of egocentric video. In *Proceedings of the IEEE/CVF Conference on Computer Vision and Pattern Recognition*, pages 18995–19012, 2022. 1
- [8] Chuming Lin, Chengming Xu, Donghao Luo, Yabiao Wang, Ying Tai, Chengjie Wang, Jilin Li, Feiyue Huang, and Yanwei Fu. Learning salient boundary feature for anchor-free temporal action localization. In *Proceedings of the IEEE/CVF Conference on Computer Vision and Pattern Recognition (CVPR)*, pages 3320–3329, June 2021. 2
- [9] Kevin Qinghong Lin, Alex Jinpeng Wang, Mattia Soldan, Michael Wray, Rui Yan, Eric Zhongcong Xu, Difei Gao, Rongcheng Tu, Wenzhe Zhao, Weijie Kong, et al. Egocentric video-language pretraining. *arXiv preprint arXiv:2206.01670*, 2022. 1
- [10] Xiaolong Liu, Qimeng Wang, Yao Hu, Xu Tang, Shiwei Zhang, Song Bai, and Xiang Bai. End-to-end temporal action detection with transformer. *IEEE Transactions on Image Processing*, 31:5427–5441, 2022. 2
- [11] Gunnar A Sigurdsson, Gül Varol, Xiaolong Wang, Ali Farhadi, Ivan Laptev, and Abhinav Gupta. Hollywood in homes: Crowdsourcing data collection for activity understanding. In *Computer Vision—ECCV 2016: 14th European Conference, Amsterdam, The Netherlands, October 11–14, 2016, Proceedings, Part I 14*, pages 510–526. Springer, 2016. 1
- [12] Yu-Gang Jiang&Jingen Liu&A Roshan Zamir&George Toderici&Ivan Laptev&Mubarak Shah& Rahul Sukthankar. Thumos challenge: Action recognition with a large number of classes. 2014. 1, 2
- [13] Du Tran, Heng Wang, Lorenzo Torresani, Jamie Ray, Yann LeCun, and Manohar Paluri. A closer look at spatiotemporal convolutions for action recognition. *2018 IEEE/CVF Conference on Computer Vision and Pattern Recognition*, pages 6450–6459, 2017. 2
- [14] Serena Yeung, Olga Russakovsky, Ning Jin, Mykhaylo Andriluka, Greg Mori, and Li Fei-Fei. Every moment counts: Dense detailed labeling of actions in complex videos. *International Journal of Computer Vision*, 126:375–389, 2018. 1
- [15] Chen-Lin Zhang, Jianxin Wu, and Yin Li. Actionformer: Localizing moments of actions with transformers. In *European Conference on Computer Vision*, volume 13664 of *LNCS*, pages 492–510, 2022. 2
